# Supplementary material for: An electrochemical anodization strategy towards high-activity porous MoS2 electrodes for the hydrogen evolution reaction
Source: Royal Society of Chemistry journal article supplement (doi:10.1039/c8ra01554f), 2018-01-01
Supplement: c8ra01554f1.pdf [file c8ra01554f1.pdf]

## Electronic Supplementary Information

### An electrochemical anodization strategy towards high-activity porous MoS<sub>2</sub> electrodes for hydrogen evolution reaction

Xuerui Mao,<sup>a</sup> Tianliang Xiao,<sup>a</sup> Qianqian Zhang<sup>b</sup> and Zhaoyue Liu<sup>\*a</sup>

<sup>a</sup> Key Laboratory of Bio-Inspired Smart Interfacial Science and Technology of Ministry of Education, School of Chemistry, Beihang University, Beijing 100191, P. R. China. E-mail: liuzy@buaa.edu.cn; Tel: 86-10-82317801

<sup>b</sup> Key Laboratory of Micro-nano Measurement, Manipulation and Physics of Ministry of Education, School of Physics and Nuclear Energy Engineering, Beihang University, Beijing 100191, P. R. China.

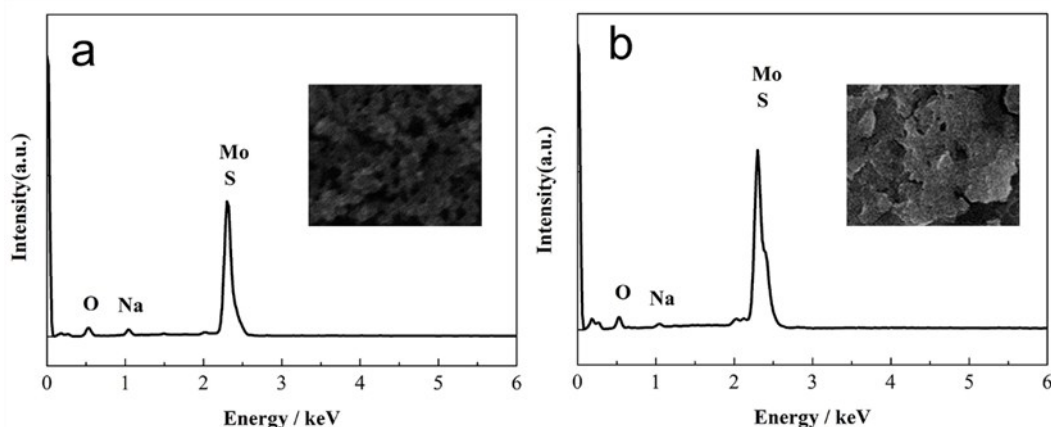

**Figure S1.** The EDX spectra of (a) nanosized particles and (b) microsized blocks. Our results confirmed the existence of Mo and S elements in particles and blocks by the overlapped characteristic peaks of Mo and S at ~2.3 keV.

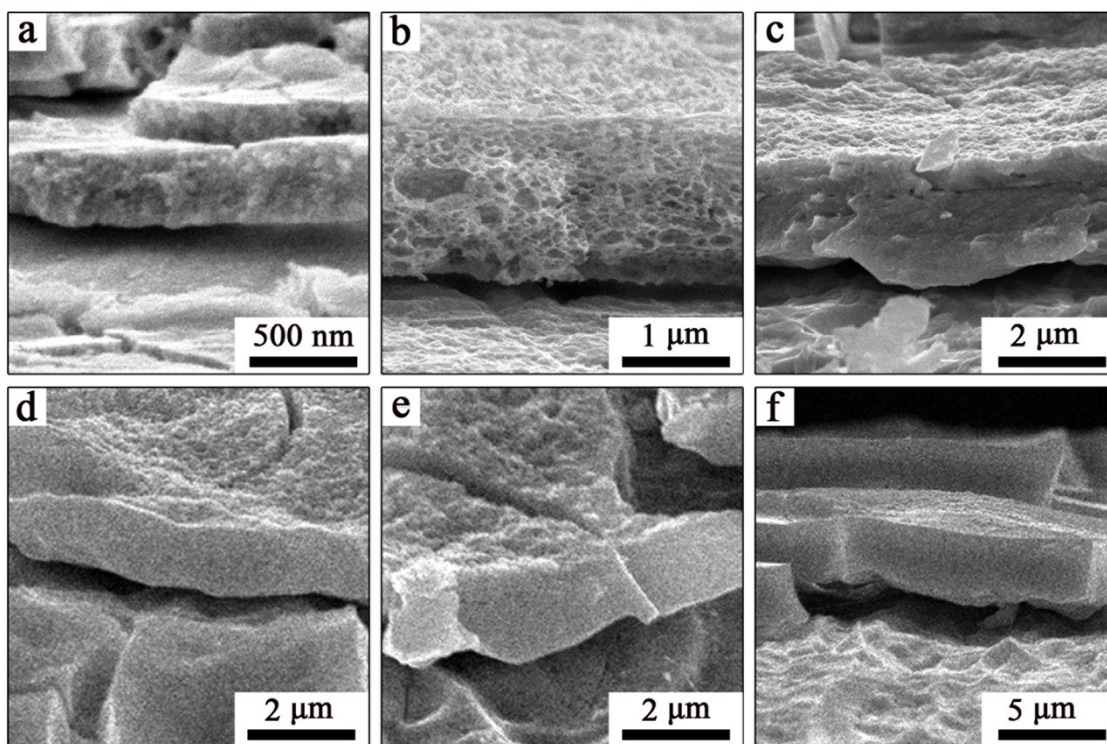

**Figure S2.** Representative cross-sectional SEM images of MoS<sub>2</sub> electrodes prepared by anodization at (a) 1.5, (b) 2.5 and (c) 3.0 V for 10 min, and at 2.5 V for 5 (d), 15 (e) and 20 min (f) respectively.

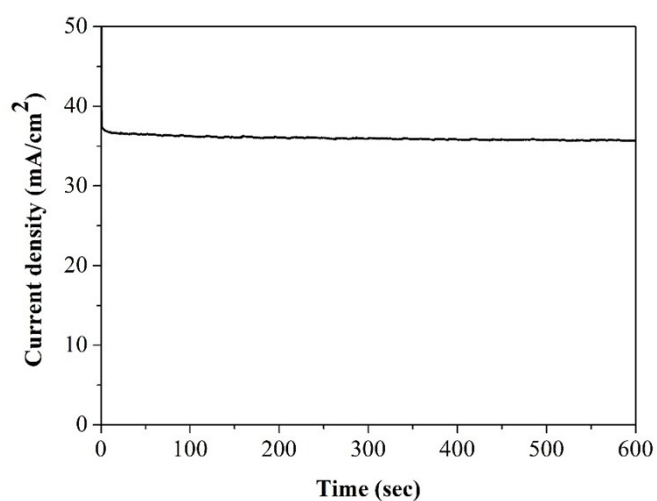

**Figure S3.** The stability of MoS<sub>2</sub> electrode prepared by anodization at 2.5 V for 15 min. The potential for HER was -0.3 V (vs. RHE). The current density (~35 mA/cm<sup>2</sup>) remains almost a constant in 600 s.

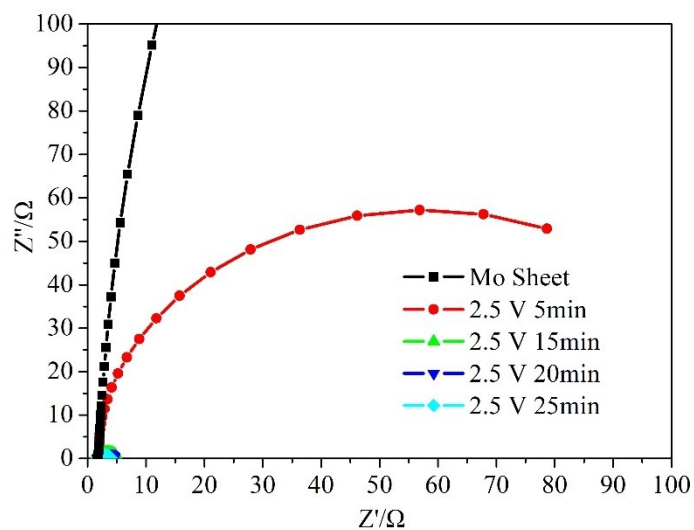

**Figure S4.** EIS spectra of original Mo sheet and MoS<sub>2</sub> electrodes at a potential of -0.2 V (vs. RHE) in 0.5 M H<sub>2</sub>SO<sub>4</sub> electrolyte. MoS<sub>2</sub> electrodes were prepared by anodizing Mo sheet in Na<sub>2</sub>S solution at 2.5 V for 5, 15, 20 and 25 min. The charge transfer resistance of MoS<sub>2</sub> electrode in HER was reduced obviously by the anodization reaction.
